# Supplementary material for: High-intensity ultrasound processing to improve the quality of semitendinosus steak from Bos indicus cattle
Source: Royal Society of Chemistry journal article supplement (doi:10.1039/d4fb00313f), 2025-01-01
Supplement: d4fb00313f1.pdf [file d4fb00313f1.pdf]

1 **High-intensity Ultrasound Processing to Improve *Semitenidinosus* Steak Quality**  
2 **from *Bos indicus* Cattle – Supplementary Tables**

3

4 Yago A. A. Bernardo<sup>1,2,3,4\*</sup>, Denes K. A. Do Rosario<sup>1,2,3,5</sup>, Lucas P. Marques<sup>2,3</sup>, Bruno D.  
5 Da Silva<sup>1,2,3,4</sup>, Maria Lúcia G. Monteiro<sup>1,2,3,4</sup>, and Carlos A. Conte-Junior<sup>1,2,3,4\*</sup>

6

7 <sup>1</sup> Analytical and Molecular Laboratorial Center (CLAn), Institute of Chemistry (IQ),  
8 Federal University of Rio de Janeiro (UFRJ), Rio de Janeiro, RJ, 21941-909, Brazil

9 <sup>2</sup> Center for Food Analysis (NAL), Technological Development Support Laboratory  
10 (LADETEC), Federal University of Rio de Janeiro (UFRJ), Rio de Janeiro, RJ, Brazil

11 <sup>3</sup> Laboratory of Advanced Analysis in Biochemistry and Molecular Biology (LAABBM),  
12 Department of Biochemistry, Federal University of Rio de Janeiro (UFRJ), Rio de  
13 Janeiro, RJ, 21941-909, Brazil

14 <sup>4</sup> Graduate Program in Food Science (PPGCAL), Institute of Chemistry (IQ), Federal  
15 University of Rio de Janeiro (UFRJ), Rio de Janeiro, RJ, 21941-909, Brazil

16 <sup>5</sup> Center for Agrarian Sciences and Engineering, Federal University of Espírito Santo  
17 (UFES), Alto Universitário, S/N Guararema, Alegre, ES, 29500-000, Brazil

18

19 \* Corresponding authors:

20 **Dr. Yago Alves de Aguiar Bernardo, DVM., MSc, PhD**

21 Avenida Athos da Silveira Ramos, nº 149, Bloco A, Sala 534a. Cidade Universitária

22 Zip code: 21.941-909, Rio de Janeiro - RJ, Brazil

23 Phone: +55 21 – 3938-7824, E-mail address: [yagoaab@ufrj.br](mailto:yagoaab@ufrj.br)

24 **Prof. Dr. Carlos Adam Conte Junior, DVM, MSc, PhD**

25 Avenida Athos da Silveira Ramos, nº 149, Bloco A, Sala 545. Cidade Universitária

26 Zip-code: 21941-909, Rio de Janeiro – RJ, Brazil

27 Phone: +55 21 – 3938-7824, E-mail: [conte@iq.ufrj.br](mailto:conte@iq.ufrj.br)

28

29 **Table S1.** Calorimetric study on VC 750 ultrasonic probe by using different powers to 1  
30 L water for 3 min.

| <b>Power input (W)</b> | <b>Diameter of probe surface (mm)</b> | <b>Power output (W)*</b> | <b>Intensity (W/cm<sup>2</sup>)**</b> |
|------------------------|---------------------------------------|--------------------------|---------------------------------------|
| 150                    | 19                                    | 25.58                    | 9.02                                  |
| 225                    |                                       | 46.51                    | 16.40                                 |
| 412.5                  |                                       | 72.09                    | 25.43                                 |
| 600                    |                                       | 120.93                   | 42.65                                 |
| 675                    |                                       | 141.86                   | 50.03                                 |

31 \* Power output calculated according to the Eq. (1).

32 \*\* Intensity determined according to the Eq. (2).

33

34 **Table S2.** Additional treatments performed to validate the models of physicochemical changes on sonicated meat.

| <b>Additional treatment</b> |           | <b>1</b>       | <b>2</b>      | <b>3</b>       | <b>4</b>     | <b>5</b>       |
|-----------------------------|-----------|----------------|---------------|----------------|--------------|----------------|
| <b>Time (min)</b>           |           | 14.5           | 9.0           | 12.3           | 18.4         | 21.1           |
| <b>Power input (W)</b>      |           | 187.5          | 637.5         | 375            | 300          | 562.5          |
| <b>DL (%)</b>               | Observed  | 0.76 ± 0.41    | 0.34 ± 0.19   | 1.81 ± 0.44    | 0.86 ± 0.38  | 2.08 ± 0.58    |
|                             | Predicted | 0.74           | 0.40          | 1.67           | 0.95         | 2.02           |
| <b>MRA (%)</b>              | Observed  | 31.6 ± 4.1     | 23.8 ± 5.2    | 29.1 ± 3.8     | 25.9 ± 3.7   | 19.9 ± 5.4     |
|                             | Predicted | 30.01          | 25.24         | 29.49          | 26.37        | 20.43          |
| <b>MDA (mg/kg)</b>          | Observed  | 0.0173 ± 0.001 | 0.017 ± 0.002 | 0.0166 ± 0.001 | 0.02 ± 0.001 | 0.0225 ± 0.002 |
|                             | Predicted | 0.0174         | 0.0176        | 0.017          | 0.0195       | 0.0222         |
| <b>Hardness (N)</b>         | Observed  | 8.61 ± 3.67    | 11.08 ± 4.28  | 9.945 ± 2.54   | 9.52 ± 2.77  | 12.55 ± 3.94   |
|                             | Predicted | 8.92           | 10.62         | 10.05          | 10.67        | 13.03          |
| <b>Toughness (N/mm·s)</b>   | Observed  | 17.72 ± 4.00   | 25.57 ± 6.89  | 22.89 ± 3.92   | 24.36 ± 3.61 | 23.5 ± 5.16    |
|                             | Predicted | 17.32          | 26.35         | 21.38          | 23.1         | 24.29          |

35 DL: drip loss, MDA: malondialdehyde, MRA: metmyoglobin reducing activity, N: Newton.

36

37 **Table S3.** Variables contributions to first three principal components.

| <b>Variable</b>                | <b>PC 1</b> | <b>PC 2</b> | <b>PC 3</b> |
|--------------------------------|-------------|-------------|-------------|
| <b>Time</b>                    | 0.182072    | 0.024113    | 0.464536    |
| <b>Power</b>                   | 0.095512    | 0.215516    | 0.152429    |
| <b>DL</b>                      | 0.005467    | 0.278721    | 0.026706    |
| <b>MRA</b>                     | 0.088209    | 0.220920    | 0.052785    |
| <b>MDA</b>                     | 0.253868    | 0.081124    | 0.001553    |
| <b>Hardness</b>                | 0.145228    | 0.179478    | 0.066830    |
| <b>Toughness</b>               | 0.229645    | 0.000127    | 0.235161    |
| <b>Variance (%)</b>            | 42.87       | 33.12       | 12.05       |
| <b>Cumulative variance (%)</b> | 42.87       | 75.99       | 88.04       |

38 DL: drip loss, MDA: malondialdehyde, MRA: metmyoglobin reducing activity, PC: principal component.
